# Supplementary material for: Predictive and stochastic reduced-order modeling of wind turbine wake dynamics
Source: Copernicus journal article supplement (doi:10.5194/wes-7-2117-2022), 2022-10-26
Supplement: Supplementary file 1 [file wes-7-2117-2022-supplement.zip]

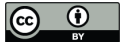

*Supplement of*

## **Predictive and stochastic reduced-order modeling of wind turbine wake dynamics**

**Søren Juhl Andersen and Juan Pablo Murcia Leon**

*Correspondence to:* Søren Juhl Andersen (sjan@dtu.dk)

- wes-7-2117-2022-supplement-title-page.pdf
- animationROM.gif

The copyright of individual parts of the supplement might differ from the article licence.
